# Supplementary material
Source: PubMed Central journal article supplement (PMC3421961)
Supplement: neo1407_0656SD1.pdf [file neo1407_0656SD1.pdf]

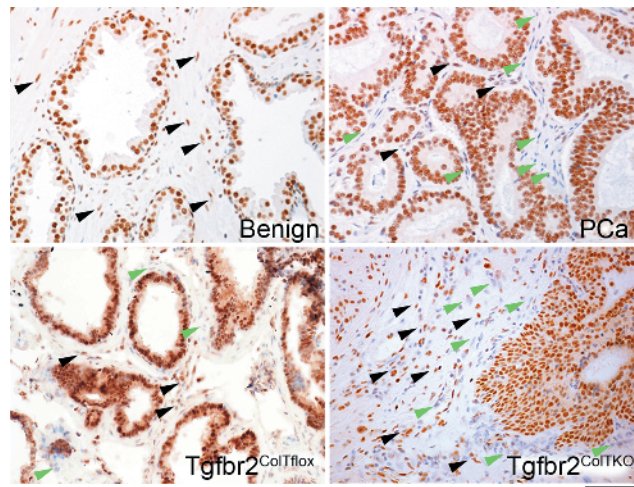

**Figure W1.** Immunohistochemical staining for phosphorylated Smad2 is uniformly expressed in the human benign and PCa epithelia. However, phosphorylated Smad2 expression is heterogeneously downregulated in the PCa-associated stroma (green arrow) and retained in the benign stromal compartment. Similarly, we observed heterogeneous down-regulation of phosphorylated Smad2 in *Tgfr2<sup>Col1TKO</sup>* mouse prostate sections (top right). Scale bar, 10  $\mu$ m.
